# Supplementary material for: Carbon dioxide affects the phase transition of poly(N-isopropylacrylamide)
Source: Royal Society of Chemistry journal article supplement (doi:10.1039/c6ra16113h), 2016-01-01
Supplement: c6ra16113h1.pdf [file c6ra16113h1.pdf]

**Supporting Information for**  
**Carbon Dioxide Affects the Phase Transition of Poly(*N*-**  
**isopropylacrylamide)**

**Yeong-Tarng Shieh<sup>a,\*</sup>, Ting-Yu Zhou,<sup>a</sup> and Shiao-Wei**

**Kuo<sup>b,\*</sup>**

<sup>a</sup>Department of Chemical and Materials Engineering, National University of Kaohsiung, Kaohsiung 811, Taiwan.

E-mail: [yts@nuk.edu.tw](mailto:yts@nuk.edu.tw)

<sup>b</sup>Department of Materials and Optoelectronic Science, National Sun Yat-Sen University, Kaohsiung 80424, Taiwan

E-mail: [kuosw@faculty.nsysu.edu.tw](mailto:kuosw@faculty.nsysu.edu.tw)

**Table S1** LCST ( $^{\circ}\text{C}$ ) and  $\Delta H$  (kJ/mol) of phase transition of PNIPAAm aqueous solution of various concentrations (1.5, 5, and 10 wt%) upon HP DSC first heating at a rate of  $2^{\circ}\text{C}/\text{min}$  in  $\text{CO}_2$  or  $\text{N}_2$  of various pressures.

| Pressure (MPa) | LCST/ $\Delta H$ |            |            |            |
|----------------|------------------|------------|------------|------------|
|                | 1.5 wt%          | 5 wt%      | 10 wt%     |            |
| $\text{CO}_2$  | 0                | 30.54/5.12 | 30.45/4.09 | 30.38/3.29 |
|                | 0.69             | 30.02/5.50 | 30.20/4.27 | 29.60/3.79 |
|                | 1.38             | 29.46/5.88 | 29.47/4.54 | 29.52/4.23 |
|                | 2.07             | 28.35/6.55 | 28.35/4.68 | 28.96/4.66 |
|                | 2.76             | 27.78/7.00 | 27.15/5.20 | 28.41/4.87 |
|                | 3.45             | 27.07/7.16 | 26.53/6.40 | 26.89/5.21 |
|                | 4.14             | 26.03/8.14 | 25.51/7.41 | 25.46/6.25 |
| $\text{N}_2$   | 0                | 30.54/5.12 | 30.45/4.09 | 30.38/3.29 |
|                | 1.38             | 30.82/5.48 | 30.72/4.52 | 30.70/3.57 |
|                | 2.76             | 31.09/6.03 | 30.82/5.24 | 30.85/4.22 |

**Table S2** LCST ( $^{\circ}\text{C}$ ) and  $\Delta H$  (kJ/mol) of phase transition of PNIPAAm aqueous solution of 5 wt% containing 1 wt% of a salt (KBr, KCl, and NaCl) upon HP DSC first heating at a rate of  $2\text{ }^{\circ}\text{C}/\text{min}$  in  $\text{CO}_2$  of various pressures

| CO <sub>2</sub> pressure<br>(MPa) | LCST/ $\Delta H$ |            |            |            |
|-----------------------------------|------------------|------------|------------|------------|
|                                   | Control          | KBr        | KCl        | NaCl       |
| 0                                 | 30.45/4.09       | 30.29/3.89 | 28.85/3.59 | 28.13/3.58 |
| 1.38                              | 29.47/4.54       | 28.84/4.47 | 27.99/4.05 | 27.86/4.01 |
| 2.76                              | 27.15/5.20       | 27.07/4.59 | 26.44/4.25 | 26.30/4.22 |
| 4.14                              | 25.51/7.41       | 24.84/4.81 | 23.72/4.36 | 23.63/4.36 |

**Table S3** LCST ( $^{\circ}\text{C}$ ) and  $\Delta H$  (kJ/mol) of phase transition of PNIPAAm aqueous solution of 5 wt% upon HP DSC first heating at a rate of  $2\text{ }^{\circ}\text{C}/\text{min}$  in  $\text{CO}_2$  of various pressures. PNIPAAm had weight average molecular weights of  $0.39 \times 10^6$  g/mol (low  $M_w$ ) and  $1.13 \times 10^6$  g/mol (high  $M_w$ ).

| CO <sub>2</sub> pressure (MPa) | LCST/ $\Delta H$ |            |
|--------------------------------|------------------|------------|
|                                | Low $M_w$        | High $M_w$ |
| 0                              | 30.45/4.09       | 30.08/3.44 |
| 0.69                           | 30.36/4.16       | 30.04/3.62 |
| 1.38                           | 29.47/4.54       | 29.15/3.91 |
| 2.07                           | 29.42/5.09       | 28.26/4.90 |
| 2.76                           | 27.15/5.20       | 27.10/5.11 |
| 3.45                           | 26.94/5.65       | 26.36/5.45 |
| 4.14                           | 25.51/7.41       | 24.95/5.88 |
